# Supplementary material for: Biodiversity of symbiotic microalgae associated with meiofaunal marine acoels in Southern Japan
Source: PeerJ. 2023 Oct 5;11:e16078. doi: 10.7717/peerj.16078 (PMC10560497; doi:10.7717/peerj.16078)
Supplement: Supplemental Information 4 [file peerj-11-16078-s004.xlsx]

## Sheet: Sheet1
Sampling Date	Sampling Location	Isolate/Culture Number	Figure Number	Symbiont Type	Representative Culture LM	DNA Extraction Kit	Cloned/Direct	Taq Polymerase	Thermocycler Protocol	Accession Number
April 2nd 2022	Ishigaki (Shiraho)	1NC	4B	Tetraselmis sp.		1	Cloned	1	1	OQ449210
April 4th 2022	Ishigaki (Kabira)	2NC	7C	Symbiodinium sp.		1	Cloned	1	2	OQ449268
April 4th 2022	Ishigaki (Kabira)	3NC	4I	Tetraselmis sp.		1	Cloned	1	1	OQ449234
April 4th 2022	Ishigaki (Kabira)	4NC	4A	Tetraselmis sp.		1	Cloned	1	1	OQ449235
April 4th 2022	Ishigaki (Kabira)	5NC	6L	Tetraselmis sp.		1	Cloned	1	1	OQ449206
April 4th 2022	Ishigaki (Kabira)	6NC	4H	Tetraselmis sp.		1	Cloned	2	1	OQ449236
April 4th 2022	Ishigaki (Kabira)	7NC	-	Heterocapsa sp.		1	Cloned	3	2	OQ439302
April 4th 2022	Ishigaki (Kabira)	8NC	4F	Tetraselmis sp.		1	Cloned	2	1	OQ449207
April 4th 2022	Ishigaki (Kabira)	9NC	4E	Tetraselmis sp.		1	Cloned	2	1	OQ449208
April 4th 2022	Ishigaki (Blue Cave)	10NC	7A	Symbiodinium cf. natans		1	Cloned	1	2	OQ449266
April 4th 2022	Ishigaki (Blue Cave)	10NC	7A	Symbiodinium cf. natans		1	Cloned	1	2	OQ449267
April 5th 2022	Okinawa (Manzamo)	11NC	7L	Symbiodinium sp.		1	Cloned	1	2	OQ449251
April 5th 2022	Okinawa (Manzamo)	12NC	7D	Symbiodinium sp.		1	Cloned	1	2	OQ449269
April 5th 2022	Okinawa (Manzamo)	13NC	7B	Symbiodinium sp.		1	Cloned	1	2	OQ449270
April 5th 2022	Okinawa (Manzamo)	14NC	7G	Symbiodinium sp.		1	Cloned	1	2	OQ449271
April 5th 2022	Okinawa (Manzamo)	15NC	7I	Symbiodinium cf. natans		1	Cloned	1	2	OQ449272
April 5th 2022	Okinawa (Manzamo)	16NC	7E	Miliolidium sp.		1	Cloned	1	2	OQ449273
April 6th 2022	Okinawa (Mizugama)	17NC	4C	Tetraselmis sp.		1	Cloned	1	1	OQ449209
April 6th 2022	Okinawa (Odo)	18NC	5H	Tetraselmis sp.		1	Cloned	1	1	OQ449237
May 20th 2022	Kochi (Ikenoura)	19NC	-	Tetraselmis sp.		1	Cloned	2	1	OQ499211
May 20th 2022	Kochi (Ikenoura)	20NC	-	Tetraselmis sp.		1	Cloned	2	1	OQ499212
May 20th 2022	Kochi (Ikenoura)	21NC	-	Tetraselmis sp.		1	Cloned	2	1	OQ499213
June 27th 2019	Kochi (Ikenoura)	K19	-	Tetraselmis sp.		1	Direct	2	1	OQ499232
May 20th 2022	Kochi (Ikenoura)	K22	-	Tetraselmis sp.	G	1	Direct	2	1	OQ499233
May 20th 2022	Kochi (Ikenoura)	K22	-	Amphidinium sp.		1	Cloned	2	2	OQ439515
July 9th 2022	Okinawa (Odo)	22-1	6A	Tetraselmis sp.		1	Cloned	2	1	OQ449225
July 9th 2022	Okinawa (Odo)	22-2	6A	Tetraselmis sp.		1	Cloned	2	1	OQ449226
July 9th 2022	Okinawa (Odo)	22-3	6A	Tetraselmis sp.		1	Cloned	2	1	OQ449227
July 9th 2022	Okinawa (Odo)	23	6J	Tetraselmis sp.		1	Direct	2	1	OQ449228
July 9th 2022	Okinawa (Odo)	24NC	6G	Tetraselmis sp.		1	Direct	2	1	OQ449229
July 9th 2022	Okinawa (Odo)	25-1	6B	Tetraselmis sp.		1	Cloned	2	1	OQ449230
July 9th 2022	Okinawa (Odo)	25-2	6B	Tetraselmis sp.		1	Cloned	2	1	OQ449231
July 7th 2022	Ishigaki (Kabira)	26-1	7F	Symbiodinium sp.		2	Direct	3	2	OQ449250
July 7th 2022	Ishigaki (Kabira)	26-2	7F	Symbiodinium sp.	L	3	Direct	2	2	OQ449281
July 7th 2022	Ishigaki (Kabira)	26-3	7F	Symbiodinium sp.		3	Direct	2	2	OQ449274
July 7th 2022	Ishigaki (Kabira)	27-1	7H	Cladocopium sp.		3	Direct	2	2	OQ449280
July 7th 2022	Ishigaki (Kabira)	27-2	7H	Cladocopium sp.		3	Direct	2	2	OQ449278
July 7th 2022	Ishigaki (Kabira)	27-3	7H	Cladocopium sp.	I	3	Direct	2	2	OQ449275
July 7th 2022	Ishigaki (Kabira)	27-4	7H	Symbiodinium sp.		3	Direct	2	2	OQ449282
July 7th 2022	Ishigaki (Kabira)	28-1	7J	Symbiodinium cf. natans		2	Direct	3	2	OQ449284
July 7th 2022	Ishigaki (Kabira)	28-2	7J	Symbiodinium sp.		3	Direct	2	2	OQ449277
July 7th 2022	Ishigaki (Kabira)	28-3	7J	Symbiodinium cf. natans		3	Direct	2	2	OQ449279
July 7th 2022	Ishigaki (Kabira)	29-1	7K	Symbiodinium cf. natans	J	3	Direct	2	2	OQ449283
July 7th 2022	Ishigaki (Kabira)	29-2	7K	Symbiodinium cf. natans		3	Direct	2	2	OQ449276
October 14th 2022	Ishigaki (Kabira)	30	8H	Symbiodinium cf. natans		1	Cloned	2	2	OQ449259
October 14th 2022	Ishigaki (Kabira)	31	6I	Tetraselmis sp.	D	1	Direct	2	1	OQ449238
October 14th 2022	Ishigaki (Kabira)	32	6H	Tetraselmis sp.		1	Cloned	2	1	OQ449216
October 14th 2022	Ishigaki (Kabira)	33	8J	Symbiodinium sp.		1	Cloned	2	2	OQ449252
October 14th 2022	Ishigaki (Kabira)	34	5F	Tetraselmis sp.		1	Cloned	2	1	OQ449217
October 14th 2022	Ishigaki (Kabira)	35	5B	Tetraselmis sp.	B	1	Cloned	2	1	OQ449218
October 14th 2022	Ishigaki (Kabira)	36	5A	Tetraselmis sp.		1	Direct	2	1	OQ449239
October 14th 2022	Ishigaki (Kabira)	37	5L	Tetraselmis sp.		1	Direct	2	1	OQ449240
October 14th 2022	Ishigaki (Kabira)	38	8E	Symbiodinium cf. natans		1	Cloned	2	2	OQ449260
October 14th 2022	Ishigaki (Kabira)	39	6F	Tetraselmis sp.	E	1	Direct	2	1	OQ449241
October 14th 2022	Ishigaki (Kabira)	40	6E	Tetraselmis sp.	C	1	Direct	2	1	OQ449242
October 14th 2022	Ishigaki (Kabira)	41	6D	Tetraselmis sp.		1	Direct	2	1	OQ449243
October 14th 2022	Ishigaki (Kabira)	42	8C	Symbiodinium cf. natans		1	Cloned	2	2	OQ449258
October 14th 2022	Ishigaki (Kabira)	43	8F	Symbiodinium cf. natans		1	Cloned	2	2	OQ449261
October 14th 2022	Ishigaki (Kabira)	44	4D	Tetraselmis sp.		1	Direct	2	1	OQ449244
October 14th 2022	Ishigaki (Kabira)	45	5J	Tetraselmis sp.		1	Cloned	2	1	OQ449219
October 14th 2022	Ishigaki (Kabira)	46	5K	Tetraselmis sp.		1	Direct	2	1	OQ449245
October 14th 2022	Ishigaki (Kabira)	47	8N	Symbiodinium cf. natans		1	Cloned	2	2	OQ449262
October 14th 2022	Ishigaki (Kabira)	48	5G	Tetraselmis sp.		1	Cloned	2	1	OQ449214
October 14th 2022	Ishigaki (Kabira)	49	5D	Tetraselmis sp.		1	Direct	2	1	OQ449221
October 14th 2022	Ishigaki (Kabira)	50	5C	Tetraselmis sp.		1	Direct	2	1	OQ449246
October 14th 2022	Ishigaki (Kabira)	51	-	Tetraselmis sp.		1	Direct	2	1	OQ449247
October 14th 2022	Ishigaki (Kabira)	52	5I	Tetraselmis sp.		1	Direct	2	1	OQ449224
October 14th 2022	Ishigaki (Kabira)	53	6C	Tetraselmis sp.		1	Cloned	2	1	OQ449220
October 14th 2022	Ishigaki (Kabira)	54	5E	Tetraselmis sp.		1	Direct	2	1	OQ449222
October 14th 2022	Ishigaki (Kabira)	55	4G	Tetraselmis sp.	H	1	Cloned	2	1	OQ449215
October 14th 2022	Ishigaki (Kabira)	56	8L	Symbiodinium sp.		1	Cloned	2	2	OQ449253
October 14th 2022	Ishigaki (Kabira)	57	6K	Tetraselmis sp.	A	1	Direct	2	1	OQ449248
October 15th 2022	Ishigaki (Shiraho)	58	4J	Tetraselmis sp.	F	1	Direct	2	1	OQ449223
October 15th 2022	Ishigaki (Shiraho)	59	4K	Tetraselmis sp.		1	Direct	2	1	OQ449249
October 15th 2022	Ishigaki (Shiraho)	60	8K	Symbiodinium sp.		1	Cloned	2	2	OQ449254
October 15th 2022	Ishigaki (Shiraho)	61	8B	Symbiodinium sp.		1	Cloned	2	2	OQ449263
October 15th 2022	Ishigaki (Shiraho)	61	8B	Amphidinium sp.		1	Cloned	2	2	OQ439515
October 15th 2022	Ishigaki (Shiraho)	62	8D	Symbiodinium cf. natans		1	Cloned	2	2	OQ449264
October 15th 2022	Ishigaki (Shiraho)	63	8A	Symbiodinium sp.	L	1	Cloned	2	2	OQ449255
October 15th 2022	Ishigaki (Shiraho)	64	8I	Symbiodinium cf. natans		1	Cloned	2	2	OQ449256
October 15th 2022	Ishigaki (Shiraho)	65	8G	Symbiodinium cf. natans		1	Cloned	2	2	OQ449257
October 15th 2022	Ishigaki (Shiraho)	66	8M	Symbiodinium cf. natans	K	1	Cloned	2	2	OQ449265
Appendix
Sampling location: Okinawa (Manzamo), 26°50'226"N, 127°84'261"E; Okinawa (Mizugama), 26°35'932"N, 127°73'859"E; Okinawa (Odo) 26°08'905"N, 127°70'742"E; Ishigaki (Blue Cave), 24°45'815"N, 124°19'574"E; Ishigaki (Kabira), 24°47'152"N, 124°14'298"E; Ishigaki (Shiraho), 24°35'865"N, 124°25'330"E; and Kochi (Ikenoura), 33°41'053"N, 133°41'181"E
DNA Extraction Kit: 1DNeasy Blood and Tissue Kit, 2Quick Extract FFPE DNA Extraction Kit, 3MasterPure Complete DNA and RNA Purification Kit
NC: No culture for the symbionts - sequences generated from whole acoel extraction.
Thermocycler Protocol: All reactions were nested from SR1 – 28-1483R (Daugbjerg et al., 2000; Nakayama et al., 1996) using the following program: initial denaturation at 94°C for 1 minute, 35 cycles of 98°C for 10s, 52°C for 5s, 68°C for 10s, and a final extension at 68°C for 5 minutes. PCR products amplified from host isolates were diluted 50 times and products from cultured material were dilute…
1Initial denaturation at 94°C for 1 minute, 25 cycles of 98°C for 10s, 56°C for 5s, 68°C for 10s, and a final extension at 68°C for 5 minutes. 2Initial denaturation at 94°C for 1 minute, 25 cycles of 98°C for 10s, 52°C for 5s, 68°C for 10s and a final extension at 68°C for 5 minutes.
